# Supplementary material
Source: PubMed Central journal article supplement (PMC2997621)
Supplement: NIHMS238685-supplement-1_si_001.pdf [file NIHMS238685-supplement-1_si_001.pdf]

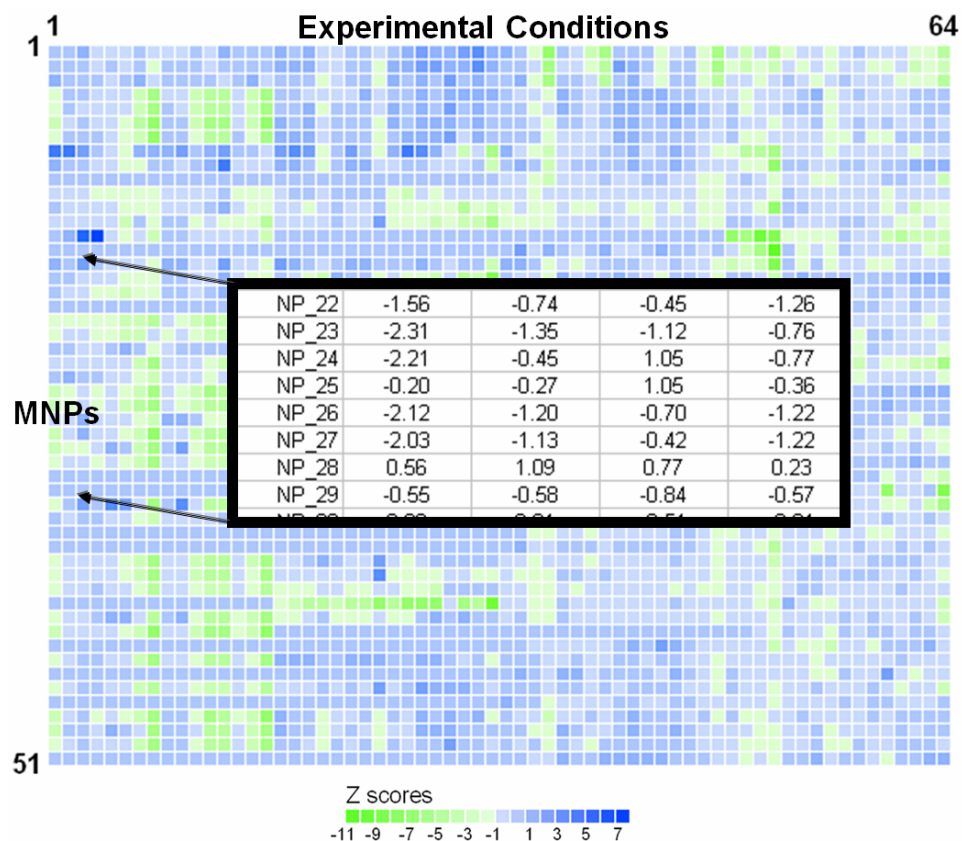

**Figure S1.** Activity Heat Map of the biological responses induced by 51 MNPs tested against four cell lines at four different concentrations using four different assays [based on data from reference (26)], representing 64 experimental conditions (dose, cell line, assay).

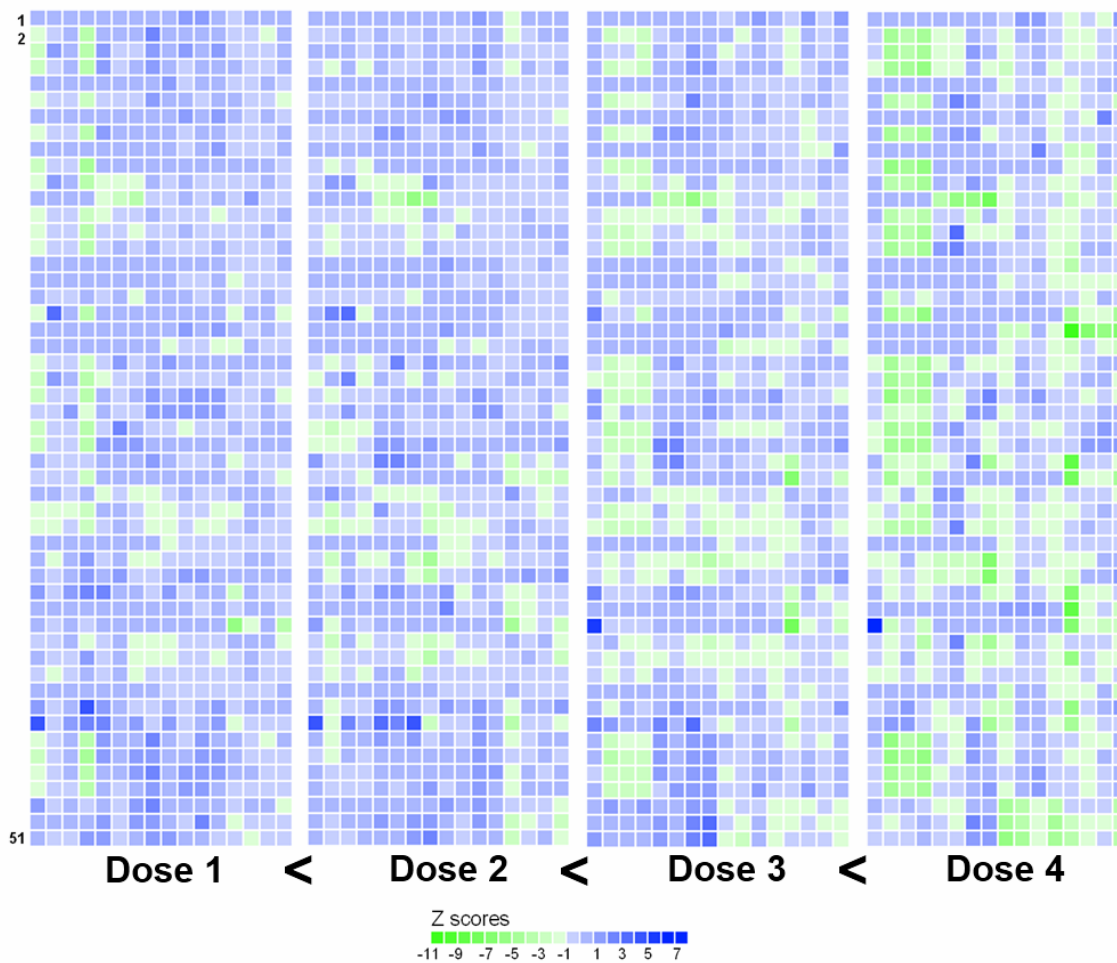

**Figure S2.** Influence of MNP concentration on their induced biological activity profiles [*doses 1-4 are equal to 0.01, 0.03, 0.1 and 0.3 Fe (mg/ml) for iron-based nanoparticles (NP\_1-48) respectively; for the three quantum dot-based nanoparticles (NP\_49-51), concentrations were equal to 1, 3, 30 and 100 nM*].

**Table S1.** Case Study 1 – QNAR classification modeling of 44 MNPs using four experimental descriptors (size, relaxivities R1 and R2, zeta potential). The overall biological activity induced by a given nanoparticle was calculated as the average of all activity (expressed as  $Z_{\text{mean}}$  scores – see text for details) for all 64 conditions (dose/cell line/assay); the classification cutoff is equal to  $Z_{\text{mean}} = -0.4$  to obtain a balanced dataset (22 nanoparticles in class 1, 22 particles in class 0). External predictions from the 5-fold Cross-Validation procedure are given in the column “Predicted Class”.

| IDs   | Experimental Descriptors |     |     |                | Mean Z score<br>( $Z_{\text{mean}}$ ) | Clusters | Class | Predicted Class |
|-------|--------------------------|-----|-----|----------------|---------------------------------------|----------|-------|-----------------|
|       | Size<br>(nm)             | R1  | R2  | Zeta potential |                                       |          |       |                 |
| NP_1  | 36                       | 19  | 45  | -19.9          | 0.20                                  | 1        | 1     | 1               |
| NP_2  | 30                       | 26  | 74  | -9.22          | -0.50                                 | 2        | 0     | 0               |
| NP_3  | 32                       | 21  | 54  | 5.9            | -0.30                                 | 2        | 1     | 1               |
| NP_4  | 74                       | 21  | 153 | -2.72          | -0.51                                 | 2        | 0     | 1               |
| NP_5  | 27                       | 17  | 36  | 3.34           | -0.09                                 | 1        | 1     | 0               |
| NP_6  | 29                       | 22  | 51  | 1.95           | -0.40                                 | 2        | 1     | 0               |
| NP_7  | 38                       | 21  | 62  | -10.1          | 0.01                                  | 1        | 1     | 0               |
| NP_8  | 33                       | 22  | 49  | -19.5          | -0.38                                 | 2        | 1     | 1               |
| NP_9  | 36                       | 19  | 45  | -14            | -0.07                                 | 1        | 1     | 1               |
| NP_10 | 28                       | 19  | 39  | 3.24           | -0.61                                 | 2        | 0     | 0               |
| NP_11 | 31                       | 23  | 59  | -9.46          | -0.59                                 | 2        | 0     | 0               |
| NP_12 | 31                       | 19  | 49  | 3.64           | -1.31                                 | 3        | 0     | 0               |
| NP_14 | 28                       | 19  | 39  | 2.34           | -0.85                                 | 2        | 0     | 0               |
| NP_15 | 24                       | 22  | 54  | -11.7          | -0.64                                 | 2        | 0     | 0               |
| NP_16 | 37                       | 21  | 52  | 0.766          | -0.07                                 | 1        | 1     | 1               |
| NP_17 | 38                       | 21  | 62  | -20.7          | -0.31                                 | 3        | 1     | 1               |
| NP_18 | 38                       | 21  | 62  | -9.08          | -0.21                                 | 1        | 1     | 0               |
| NP_19 | 31                       | 19  | 49  | -3.61          | -0.49                                 | 2        | 0     | 0               |
| NP_20 | 38                       | 21  | 62  | -9.34          | -0.50                                 | 1        | 0     | 1               |
| NP_21 | 28                       | 15  | 40  | -9.23          | -0.47                                 | 3        | 0     | 0               |
| NP_22 | 36                       | 36  | 122 | -21.9          | -0.35                                 | 2        | 1     | 1               |
| NP_23 | 31                       | 20  | 45  | -6.11          | -0.62                                 | 2        | 0     | 0               |
| NP_26 | 40                       | 15  | 30  | -12            | -0.68                                 | 2        | 0     | 1               |
| NP_27 | 40                       | 15  | 30  | -3.77          | -0.03                                 | 2        | 1     | 0               |
| NP_28 | 40                       | 15  | 30  | -7.57          | -0.46                                 | 1        | 0     | 0               |
| NP_29 | 40                       | 15  | 30  | 0.25           | -0.89                                 | 1        | 0     | 0               |
| NP_30 | 40                       | 15  | 30  | -6.05          | -0.49                                 | 3        | 0     | 0               |
| NP_31 | 20                       | 0.5 | 0.5 | -12.3          | -0.89                                 | 3        | 0     | 0               |
| NP_32 | 20                       | 0.5 | 0.5 | -4.22          | -1.15                                 | 3        | 0     | 0               |
| NP_33 | 20                       | 0.5 | 0.5 | -7.15          | -0.99                                 | 3        | 0     | 0               |
| NP_34 | 20                       | 0.5 | 0.5 | -4.3           | -0.35                                 | 3        | 1     | 0               |
| NP_35 | 20                       | 0.5 | 0.5 | -12.1          | -0.23                                 | 3        | 1     | 1               |
| NP_36 | 20                       | 0.5 | 0.5 | -15.6          | -0.32                                 | 1        | 1     | 1               |
| NP_37 | 20                       | 0.5 | 0.5 | -16.1          | -0.56                                 | 1        | 0     | 0               |
| NP_38 | 20                       | 0.5 | 0.5 | -4.7           | -0.82                                 | 1        | 0     | 0               |
| NP_39 | 20                       | 0.5 | 0.5 | -6.47          | -0.93                                 | 3        | 0     | 0               |
| NP_40 | 20                       | 0.5 | 0.5 | -6.54          | -0.64                                 | 3        | 0     | 0               |
| NP_41 | 20                       | 0.5 | 0.5 | -10.8          | -0.33                                 | 3        | 1     | 0               |
| NP_42 | 20                       | 0.5 | 0.5 | -7.7           | 0.04                                  | 3        | 1     | 0               |
| NP_43 | 20                       | 0.5 | 0.5 | -6.75          | 0.14                                  | 1        | 1     | 0               |
| NP_45 | 23                       | 29  | 62  | -13.6          | -0.25                                 | 2        | 1     | 1               |
| NP_46 | 33                       | 36  | 106 | -14.5          | -0.33                                 | 2        | 1     | 1               |
| NP_47 | 28                       | 32  | 60  | -9.23          | -0.21                                 | 2        | 1     | 1               |
| NP_48 | 25                       | 29  | 49  | -37            | -0.25                                 | 2        | 1     | 1               |

**Table S2.** Case Study 2 – PaCa2 cell uptake for 109 MNPs with different surface modifiers.

| IDs | SMILES strings                                               | PaCa2 cellular uptake<br>(log <sub>10</sub><br>[nanoparticles]/cell<br>pM) |
|-----|--------------------------------------------------------------|----------------------------------------------------------------------------|
| 1   | <chem>FC(F)(F)C(=O)OC(=O)C(F)(F)F</chem>                     | 4.17                                                                       |
| 2   | <chem>FC(F)(Cl)C(=O)OC(=O)C(F)(F)Cl</chem>                   | 3.95                                                                       |
| 3   | <chem>FC(F)(F)C(F)(F)C(=O)OC(=O)C(F)(F)C(F)(F)F</chem>       | 4.08                                                                       |
| 4   | <chem>CC1(C)CC(=O)OC1=O</chem>                               | 4.11                                                                       |
| 5   | <chem>O=C1OC(=O)C=C1</chem>                                  | 3.98                                                                       |
| 6   | <chem>CC1=CC(=O)OC1=O</chem>                                 | 3.58                                                                       |
| 7   | <chem>CC1=C(C)C(=O)OC1=O</chem>                              | 3.48                                                                       |
| 8   | <chem>CCCCC(=O)OC(=O)CCCC</chem>                             | 3.65                                                                       |
| 9   | <chem>CC1CC(=O)OC1=O</chem>                                  | 3.64                                                                       |
| 10  | <chem>O=C1OC(=O)c2cc(ccc12)C(=O)c1ccc2C(=O)OC(=O)c2c1</chem> | 3.51                                                                       |
| 11  | <chem>O=C1OC(=O)c2cc(ccc12)N(=O)=O</chem>                    | 3.27                                                                       |
| 12  | <chem>Br1ccc2C(=O)OC(=O)c3cccc1c23</chem>                    | 3.63                                                                       |
| 13  | <chem>O=C1OC(=O)c2ccc3C(=O)OC(=O)c4ccc1c2c34</chem>          | 3.67                                                                       |
| 14  | <chem>Fc1c(F)c(F)c2C(=O)OC(=O)c2c1F</chem>                   | 3.83                                                                       |
| 15  | <chem>O=C1OC(=O)c2cc(cc3cccc1c23)N(=O)=O</chem>              | 4.11                                                                       |
| 16  | <chem>Oc1cccc2C(=O)OC(=O)c12</chem>                          | 3.97                                                                       |
| 17  | <chem>O=C1OC(=O)C2C3CCC(C=C3)C12</chem>                      | 3.90                                                                       |
| 18  | <chem>Clc1ccc2NC(=O)OC(=O)c2c1</chem>                        | 4.18                                                                       |
| 19  | <chem>O=C1OS(=O)(=O)c2ccccc12</chem>                         | 3.88                                                                       |
| 20  | <chem>ClC1=C(Cl)C(=O)OC1=O</chem>                            | 3.84                                                                       |
| 21  | <chem>CC(=O)SC1CC(=O)OC1=O</chem>                            | 3.59                                                                       |
| 22  | <chem>Clc1cc2C(=O)OC(=O)c2cc1Cl</chem>                       | 4.12                                                                       |
| 23  | <chem>O=C1OC(=O)C2C3OC(C=C3)C12</chem>                       | 3.82                                                                       |
| 24  | <chem>O=C1OC(=O)C2C3C=CC(C12)C1C3C(=O)OC1=O</chem>           | 3.63                                                                       |
| 25  | <chem>O=C1OC(=O)C2CC=CCCC12</chem>                           | 3.89                                                                       |
| 26  | <chem>O=C1OC(=O)c2cccc2-c2ccccc12</chem>                     | 3.77                                                                       |
| 27  | <chem>O=C1OC(=O)c2ccc(c3cccc1c23)N(=O)=O</chem>              | 3.93                                                                       |
| 28  | <chem>O=C1OC(=O)C2C1C1C2C(=O)OC1=O</chem>                    | 3.77                                                                       |
| 29  | <chem>CCCCCCCCCCCC(=O)OC(=O)CCCCCCCCCCCC</chem>              | 3.82                                                                       |
| 30  | <chem>OC(=O)c1ccc2C(=O)OC(=O)c2c1</chem>                     | 3.55                                                                       |
| 31  | <chem>Cc1ccc2C(=O)OC(=O)c2c1</chem>                          | 3.98                                                                       |
| 32  | <chem>O=C1OC(=O)c2c1cccc2N(=O)=O</chem>                      | 3.50                                                                       |
| 33  | <chem>O=C1Cc2ccccc2C(=O)O1</chem>                            | 3.78                                                                       |
| 34  | <chem>O=C1CCCC(=O)O1</chem>                                  | 4.07                                                                       |
| 35  | <chem>O=C1CN(CCN2CC(=O)OC(=O)C2)CC(=O)O1</chem>              | 3.93                                                                       |
| 36  | <chem>O=C1Nc2ccccc2C(=O)O1</chem>                            | 4.44                                                                       |
| 37  | <chem>CN1C(=O)OC(=O)c2ccccc12</chem>                         | 3.36                                                                       |
| 38  | <chem>CC1CC(=O)OC(=O)C1</chem>                               | 3.91                                                                       |
| 39  | <chem>O=C1OC(=O)C2=C1CCCC2</chem>                            | 3.73                                                                       |
| 40  | <chem>CC(=O)OC1C(OC(C)=O)C(=O)OC1=O</chem>                   | 3.91                                                                       |
| 41  | <chem>Br1c(Br)c(Br)c2C(=O)OC(=O)c2c1Br</chem>                | 3.80                                                                       |
| 42  | <chem>O=C1OC(=O)C2CCCCC12</chem>                             | 3.93                                                                       |
| 43  | <chem>O=C1OC(=O)C2=C1CCCC2</chem>                            | 3.69                                                                       |
| 44  | <chem>ICC(=O)OC(=O)C1</chem>                                 | 3.42                                                                       |
| 45  | <chem>ClCC(=O)OC(=O)CC1</chem>                               | 3.63                                                                       |
| 46  | <chem>ClC1=C(Cl)C2(Cl)C3C(C(=O)OC3=O)C1(Cl)C2(Cl)Cl</chem>   | 3.47                                                                       |
| 47  | <chem>CCCCCCCCCCCCCCCC(=O)OC(=O)CCCCCCCCCCCCCCCC</chem>      | 3.55                                                                       |
| 48  | <chem>Nc1ccc2C(=O)OC(=O)c3cccc1c23</chem>                    | 3.64                                                                       |
| 49  | <chem>CCCCCCCCCCCC(=O)OC(=O)CCCCCCCC</chem>                  | 4.03                                                                       |
| 50  | <chem>O=C1CC2(CCCC2)CC(=O)O1</chem>                          | 4.06                                                                       |
| 51  | <chem>O=C1OC(=O)C2C3CCC(C3)C12</chem>                        | 3.94                                                                       |
| 52  | <chem>O=C1OC(=O)c2cccc3cccc1c23</chem>                       | 3.96                                                                       |
| 53  | <chem>O=C1CCC(C(=O)O1)c1ccccc1</chem>                        | 4.02                                                                       |

|     |                                                             |      |
|-----|-------------------------------------------------------------|------|
| 54  | <chem>Clc1c(Cl)c(Cl)c2C(=O)OC(=O)c2c1Cl</chem>              | 3.83 |
| 55  | <chem>Clc1ccc(Cl)c2C(=O)OC(=O)c12</chem>                    | 3.90 |
| 56  | <chem>CC1(C)CCC(=O)OC1=O</chem>                             | 3.94 |
| 57  | <chem>CCCCCN</chem>                                         | 3.78 |
| 58  | <chem>CC(C)CC(C)N</chem>                                    | 3.85 |
| 59  | <chem>NC1C(O)CC(CO)C(O)C1O</chem>                           | 3.36 |
| 60  | <chem>CCCCCCN</chem>                                        | 3.75 |
| 61  | <chem>CC(C)(C)N</chem>                                      | 3.86 |
| 62  | <chem>CC(C)CN</chem>                                        | 3.72 |
| 63  | <chem>CC(C)(C)CN</chem>                                     | 3.75 |
| 64  | <chem>CC(C)CCN</chem>                                       | 3.83 |
| 65  | <chem>CCC(N)CC</chem>                                       | 3.81 |
| 66  | <chem>CCC(C)(C)N</chem>                                     | 4.07 |
| 67  | <chem>NCCN</chem>                                           | 3.46 |
| 68  | <chem>CCCCCCCCCCCCCN</chem>                                 | 4.06 |
| 69  | <chem>NCCCN</chem>                                          | 3.49 |
| 70  | <chem>NCCCCN</chem>                                         | 3.48 |
| 71  | <chem>NCCCCCN</chem>                                        | 3.62 |
| 72  | <chem>CCCCC(CC)CN</chem>                                    | 3.95 |
| 73  | <chem>CCCCCCCCCCCCCCCN</chem>                               | 3.97 |
| 74  | <chem>CCCCC(C)N</chem>                                      | 3.63 |
| 75  | <chem>CCCCCCCCCCCCCCCN</chem>                               | 4.27 |
| 76  | <chem>NCCNCCN</chem>                                        | 3.77 |
| 77  | <chem>NCC12CC3CC(CC(C3)C1)C2</chem>                         | 2.84 |
| 78  | <chem>NCCc1ccc(O)c(O)c1</chem>                              | 2.53 |
| 79  | <chem>NCCc1ccc(O)cc1</chem>                                 | 2.77 |
| 80  | <chem>NCCCNCCCCNCCN</chem>                                  | 2.41 |
| 81  | <chem>NCCNCCCNCCN</chem>                                    | 2.23 |
| 82  | <chem>NCCNCCNCCNCCNCCN</chem>                               | 2.54 |
| 83  | <chem>NC12CC3CC(CC1C3)C2</chem>                             | 3.12 |
| 84  | <chem>NC1C2CC3CC(C2)CC1C3</chem>                            | 3.18 |
| 85  | <chem>NCC(O)=O</chem>                                       | 2.57 |
| 86  | <chem>COC(=O)C(N)Cc1ccccc1</chem>                           | 3.39 |
| 87  | <chem>NC(CO)C(O)=O</chem>                                   | 3.36 |
| 88  | <chem>CC(O)C(N)C(O)=O</chem>                                | 3.21 |
| 89  | <chem>NC(Cc1c[nH]e2ccccc12)C(O)=O</chem>                    | 3.19 |
| 90  | <chem>NC(Cc1ccc(O)cc1)C(O)=O</chem>                         | 3.07 |
| 91  | <chem>CC(C)C(N)C(O)=O</chem>                                | 3.27 |
| 92  | <chem>NCCCC(N)C(O)=O</chem>                                 | 3.25 |
| 93  | <chem>NC(C(O)=O)c1ccc(Cl)cc1</chem>                         | 3.06 |
| 94  | <chem>CC(N)C(O)=O</chem>                                    | 2.90 |
| 95  | <chem>NC(CCCN(C)N)C(O)=O</chem>                             | 3.15 |
| 96  | <chem>NC(CC(O)=O)C(O)=O</chem>                              | 3.29 |
| 97  | <chem>NC(CCC(N)=O)C(O)=O</chem>                             | 3.32 |
| 98  | <chem>NC(CCC(O)=O)C(O)=O</chem>                             | 3.40 |
| 99  | <chem>NC(Cc1c[nH]cn1)C(O)=O</chem>                          | 3.38 |
| 100 | <chem>CSCCC(N)C(O)=O</chem>                                 | 3.23 |
| 101 | <chem>NC(Cc1ccccc1)C(O)=O</chem>                            | 3.29 |
| 102 | <chem>O=C1CCC(=O)O1</chem>                                  | 4.24 |
| 103 | <chem>CC(=O)OC(C)=O</chem>                                  | 4.05 |
| 104 | <chem>C=C1CC(=O)OC1=O</chem>                                | 4.04 |
| 105 | <chem>O=C1COCC(=O)O1</chem>                                 | 3.99 |
| 106 | <chem>O=C1OC(=O)c2ccccc12</chem>                            | 3.90 |
| 107 | <chem>OC(=O)CC1CC(=O)OC1=O</chem>                           | 4.03 |
| 108 | <chem>Fc1ccc(F)c2C(=O)OC(=O)c12</chem>                      | 3.91 |
| 109 | <chem>OC(=O)CN(CCN1CC(=O)OC(=O)C1)CCN1CC(=O)OC(=O)C1</chem> | 4.10 |

**Table S3.** Top-10 selected descriptors for each modeling fold according to their model frequency.

| Fold 1          |       | Fold 2          |       | Fold 3          |       | Fold 4          |       | Fold 5          |       |
|-----------------|-------|-----------------|-------|-----------------|-------|-----------------|-------|-----------------|-------|
| Descriptor Name | Freq. |
| vsa_other       | 0.28  | SlogP_VSA5      | 0.26  | PEOE_VSA+1      | 0.38  | SlogP_VSA1      | 0.29  | SlogP_VSA2      | 0.32  |
| PEOE_VSA+1      | 0.27  | PEOE_VSA-2      | 0.23  | SlogP_VSA0      | 0.22  | SlogP_VSA2      | 0.23  | SlogP_VSA1      | 0.28  |
| SlogP_VSA5      | 0.26  | SlogP_VSA1      | 0.21  | PEOE_VSA_FPOS   | 0.19  | SlogP_VSA5      | 0.21  | SlogP_VSA0      | 0.23  |
| b_double        | 0.24  | PEOE_VSA_FPOS   | 0.20  | SlogP_VSA5      | 0.16  | SMR_VSA4        | 0.19  | b_double        | 0.21  |
| SlogP_VSA1      | 0.21  | GCUT_SLOGP_0    | 0.19  | a_nN            | 0.16  | BCUT_PEOE_3     | 0.19  | VAdjEq          | 0.20  |
| vsa_don         | 0.18  | GCUT_SMR_1      | 0.19  | PEOE_VSA_FNEG   | 0.16  | vsa_don         | 0.17  | zagreb          | 0.20  |
| GCUT_PEOE_1     | 0.16  | BCUT_SLOGP_1    | 0.17  | BCUT_PEOE_1     | 0.15  | BCUT_SLOGP_1    | 0.15  | VDistMa         | 0.17  |
| SlogP_VSA2      | 0.15  | SlogP_VSA2      | 0.17  | SlogP_VSA1      | 0.15  | SMR_VSA2        | 0.15  | PEOE_PC-        | 0.17  |
| GCUT_SMR_1      | 0.14  | b_double        | 0.17  | BCUT_SLOGP_1    | 0.14  | GCUT_PEOE_2     | 0.14  | VAdjMa          | 0.17  |
| GCUT_SMR_0      | 0.13  | BCUT_SLOGP_0    | 0.17  | b_double        | 0.14  | PEOE_VSA_FPOS   | 0.14  | chi0v_C         | 0.16  |

**Table S4.** Top-10 descriptors with the highest averaged frequency.

| <b>Descriptor Name</b> | <b>Avg. Freq.</b> |
|------------------------|-------------------|
| SlogP_VSA1             | 0.23              |
| SlogP_VSA2             | 0.19              |
| SlogP_VSA5             | 0.18              |
| b_double               | 0.18              |
| SlogP_VSA0             | 0.16              |
| PEOE_VSA+1             | 0.16              |
| vsa_don                | 0.15              |
| vsa_other              | 0.14              |
| vsa_base               | 0.12              |
| PEOE_VSA_FPOS          | 0.12              |
